# Supplementary material
Source: Elsevier journal article supplement (https://www.sciencedirect.com/science/article/pii/S1575181318302158)
Supplement: mmc1 [file S1575181318302158:mmc1.pdf]

## MATERIAL ADICIONAL

Tabla 1. Porcentajes de respuesta de variables estudiadas

| Variable /Respuesta (%)                                                        | Totalmente de acuerdo | De acuerdo | Ni de acuerdo ni en desacuerdo | En desacuerdo | Totalmente en desacuerdo | No sabe/no contesta |
|--------------------------------------------------------------------------------|-----------------------|------------|--------------------------------|---------------|--------------------------|---------------------|
| Para investigar se necesita tiempo                                             | 40                    | 6          | 35,4                           | 5,7           | 12,9                     | 0                   |
| Afecta negativamente a mi vida personal                                        | 1,4                   | 17,1       | 24,3                           | 24,3          | 31,4                     | 1,4                 |
| Las obligación personales son obstáculo para realizar investigación            | 2,9                   | 28,6       | 22,9                           | 27,1          | 18,6                     | 0                   |
| No dispongo de tiempo en la jornada laboral                                    | 40                    | 32,9       | 14,3                           | 8,6           | 4,3                      | 0                   |
| Realizar un trabajo de investigación entorpecería mis funciones                | 17,1                  | 37,1       | 25,7                           | 15,7          | 4,3                      | 0                   |
| La distribución por turnos dificulta la investigación                          | 8,6                   | 40         | 18,6                           | 22,9          | 8,6                      | 1,4                 |
| Parte del tiempo de la jornada debería emplearse en proyectos de investigación | 32,9                  | 31,4       | 24,3                           | 8,6           | 2,9                      | 0                   |
| Enfermería debe leer revistas científica con asiduidad                         | 40                    | 47,1       | 11,4                           | 1,4           | 0                        | 0                   |
| No existe suficiente formación para la investigación enfermera                 | 14,3                  | 35,7       | 21,4                           | 22,9          | 5,7                      | 0                   |
| Planes de estudio deben incluir formación en investigación                     | 57,1                  | 40         | 2,9                            | 0             | 0                        | 0                   |
| Poseer conocimiento sobre nuevas tecnologías                                   | 72,9                  | 27,1       | 0                              | 0             | 0                        | 0                   |
| Conocimientos de otros idiomas                                                 | 78,6                  | 21,4       | 0                              | 0             | 0                        | 0                   |

|                                                                                                 |      |      |      |      |      |      |
|-------------------------------------------------------------------------------------------------|------|------|------|------|------|------|
| facilita la investigación                                                                       |      |      |      |      |      |      |
| Enfermería esta igual capacitada que otros profesionales sanitarios para realizar investigación | 64,3 | 24,3 | 10   | 1,4  | 0    | 0    |
| Recibo apoyo y motivación por parte la dirección para investigar                                | 5,7  | 5,7  | 30   | 40   | 18,6 | 0    |
| Investigación recibe los mismos apoyo externos que otros profesionales sanitarios               | 1,4  | 5,7  | 27,1 | 41,4 | 14,3 | 10   |
| En mi lugar de trabajo tengo acceso a fuentes información para investigar                       | 1,4  | 15,7 | 25,7 | 34,3 | 17,1 | 5,7  |
| Investigar necesita recursos económicos difíciles de conseguir                                  | 15,7 | 27,1 | 25,7 | 25,7 | 4,3  | 1,4  |
| En mi trabajo, el resto del equipo multidisciplinar colaboraría en un proyecto de investigación | 8,6  | 48,6 | 28,6 | 10   | 2,9  | 1,4  |
| En mi puesto de trabajo tengo acceso a recursos materiales para investigar                      | 8,6  | 35,7 | 15,7 | 31,4 | 7,1  | 1,4  |
| En mi puesto de trabajo tengo acceso a literatura científica enfermera                          | 4,3  | 24,3 | 18,6 | 34,3 | 15,7 | 2,9  |
| Enfermería cuenta con el mismo apoyo económico que otros profesionales                          | 1,4  | 8,6  | 22,9 | 30   | 22,9 | 14,3 |
| Investigar es una función de mi actividad profesional                                           | 37,1 | 47,1 | 7,1  | 7,1  | 1,4  | 0    |
| Como enfermera tengo autoridad                                                                  | 58,6 | 37,1 | 4,3  | 0    | 0    | 0    |

|                                                                                                |      |      |      |      |      |     |
|------------------------------------------------------------------------------------------------|------|------|------|------|------|-----|
| para decidir los cuidados del paciente                                                         |      |      |      |      |      |     |
| Las funciones de enfermería son fundamentalmente prácticas y no precisan incluir investigación | 4,3  | 5,7  | 7,1  | 48,6 | 34,3 | 0   |
| Estaría dispuesta a colaborar con otros profesionales en sus trabajos de investigación         | 41,4 | 51,4 | 2,9  | 4,3  | 0    | 0   |
| Investigar aporta beneficios a la práctica profesional enfermera                               | 78,6 | 20   | 1,4  | 0    | 0    | 0   |
| No necesito investigar para mejorar mi trabajo                                                 | 1,4  | 10   | 7,1  | 44,3 | 37,1 | 0   |
| Investigar es una función delegada por otros profesionales                                     | 0    | 4,3  | 12,9 | 38,6 | 44,3 | 0   |
| En enfermería es difícil encontrar campos interesantes para investigar                         | 0    | 10   | 17,1 | 42,3 | 28,6 | 1,4 |
| Investigar mejora el reconocimiento de la profesión enfermera                                  | 62,9 | 31,4 | 4,3  | 1,4  | 0    | 0   |
| Enfermería no es una profesión orientada hacia la investigación                                | 2,9  | 14,3 | 18,6 | 30   | 34,3 | 0   |
| Me gustaría participar en un trabajo de investigación                                          | 38,6 | 45,7 | 8,6  | 4,3  | 1,4  | 1,4 |
| Me siento capaz de liderar un trabajo de investigación                                         | 21,4 | 27,1 | 21,4 | 22,9 | 4,3  | 2,9 |
| Alcanzar un grado superior en mi carrera profesional es un aliciente para investigar           | 28,6 | 44,3 | 22,9 | 4,3  | 0    | 0   |

|                                                                                                 |      |      |      |      |      |     |
|-------------------------------------------------------------------------------------------------|------|------|------|------|------|-----|
| Una recompensa económica aumentara el interés por investigar                                    | 27,1 | 50   | 14,3 | 8,6  | 0    | 0   |
| Publicar un trabajo de investigación no está reconocido profesionalmente                        | 4,3  | 17,2 | 21,4 | 34,3 | 12,9 | 10  |
| No merece la pena investigar para aumentar la puntuación de mi curriculum y ser más competitivo | 0    | 5,7  | 7,1  | 47,1 | 40   | 0   |
| Me interesan los trabajos de investigación que se desarrollan en mi centro de trabajo           | 15,7 | 34,3 | 37,1 | 5,7  | 1,4  | 5,7 |
